# Supplementary material for: Aerobic exercise-induced changes in fluid biomarkers in Parkinson’s disease
Source: Springer Nature journal article supplement (doi:10.1038/s41531-025-01042-8), 2025-07-01
Supplement: MOESM1 [file 41531_2025_1042_MOESM1_ESM.pdf]

**Supplemental Table 1A. Biomarkers Changes in Parkinson's Disease**

| Biomarker                                   | Sample Source | Study (reference number)             | Type of Study     | Sample size                | Direction of Change in PD | Magnitude of Change                            | Associated P-value        |
|---------------------------------------------|---------------|--------------------------------------|-------------------|----------------------------|---------------------------|------------------------------------------------|---------------------------|
| <i>Neurotrophic/Neuroprotective Markers</i> |               |                                      |                   |                            |                           |                                                |                           |
| BDNF                                        | Serum         | Jiang et al. 2019 (#57)              | Meta-analysis     | 838 PD, 657 HC (9 studies) | Decreased                 | SMD = -1.03                                    | p = 0.012                 |
| BDNF                                        | Serum         | Rahmani et al. 2019 (#60)            | Meta-analysis     | 434 PD, 545 HC (8 studies) | Decreased                 | MD = -2.99 ng/mL                               | p = 0.03                  |
| BDNF                                        | Brain tissue  | Howells et al. 2000 (#69)            | Original research | 5 PD, 5 HC                 | Decreased                 | 30% reduction in people with PD                | p = 0.001                 |
| GDNF                                        | Serum         | Tong et al. 2023 (#59)               | Original research | 105 PD, 45 HC              | Decreased                 | 17% reduction in people with PD                | p = 0.008                 |
| GDNF                                        | Serum         | Liu et al. 2020 (#83)                | Original research | 112 PD, 43 HC              | Decreased                 | 21% reduction in people with PD                | p < 0.05                  |
| GDNF                                        | Brain tissue  | Virachit et al. 2019 (#54)           | Original research | 10 PD, 9 HC                | Decreased                 | 19% reduction in hippocampus of people with PD | p = 0.04                  |
| IGF-1                                       | Blood         | Castilla-Cortazar et al. 2020 (#103) | Systematic review | 949 PD and HC (11 studies) | Increased                 | 2-54% elevation in people with PD              | p < 0.01 for most studies |
| IGF-1                                       | Serum         | Shi et al. 2023 (#104)               | Original research | 100 PD, 100 HC             | Increased                 | 51% elevation in people with PD                | p < 0.001                 |
| IGF-1                                       | Serum         | Picillo et al. 2017 (#105)           | Original research | 405 PD, 191 HC             | Unchanged                 | None                                           | n/a                       |
| IGF-1                                       | Serum         | Godau et al. 2010 (#106)             | Original research | 12 PD, 12 HC               | Increased                 | 49% elevation in people with PD                | p < 0.001                 |
| IGF-1                                       | Serum         | Mashayekhi et al. 2010 (#61)         | Original research | 38 PD, 38 HC               | Increased                 | 54% elevation in people with PD                | p < 0.001                 |
| IGF-1                                       | CSF           | Mashayekhi et al. 2010 (#61)         | Original research | 38 PD, 38 HC               | Increased                 | 36% reduction in people with PD                | p < 0.001                 |
| VEGF                                        | Serum         | Infante et al. 2007 (#119)           | Original research | 191 PD, 121 HC             | Unchanged                 | None                                           | n/a                       |
| VEGF                                        | CSF           | Janelidze et al. 2015 (#56)          | Original research | 82 PD, 38 HC               | Increased                 | 10% elevation in people with PD                | p = 0.012                 |

|         |              |                                   |                   |                       |               |                                                                      |           |
|---------|--------------|-----------------------------------|-------------------|-----------------------|---------------|----------------------------------------------------------------------|-----------|
| Irisin  | Plasma       | Shi et al. 2024 (#137)            | Original research | 100 PD, 70 HC         | Decreased     | 5% reduction in people with PD                                       | p = 0.021 |
| SIRT3   | Brain tissue | Trinh et al. 2023 (#150)          | Original research | 8-11 PD and HC        | Decreased     | 57% reduction in SNc, 34% reduction in hippocampus in people with PD | p < 0.05  |
| Lactate | CSF          | Liguori et al. 2022 (#163)        | Original research | 101 de novo PD, 60 HC | Increased     | 11% elevation in people with PD                                      | p = 0.03  |
| Lactate | Serum        | Miyaue et al. 2020 (#164)         | Original research | 20 PD, 18 HC          | Unchanged     | None                                                                 | n/a       |
| NGF     | Serum        | Lorigados Pedre et al. 2002 (#58) | Original research | 17 PD, 16 HC          | Decreased     | 78% reduction in people with PD                                      | p < 0.01  |
| NGF     | Brain tissue | Mogi et al. 1999 (#345)           | Original research | 19 PD, 19 HC          | Decreased     | 97% reduction in substantia nigra in people with PD                  | p < 0.05  |
| CDNF    | Brain tissue | Virachit et al. 2019 (#54)        | Original research | 10 PD, 9 HC           | Increased     | 41% elevation in hippocampus in people with PD                       | p = 0.02  |
| CDNF    | Serum        | Galli et al. 2019 (#62)           | Original research | 34 PD, 35 HC          | No difference | 21% elevation in people with PD                                      | p = 0.25  |
| MANF    | Serum        | Galli et al. 2019 (#62)           | Original research | 34 PD, 35 HC          | Increased     | 104% elevation in people with PD                                     | p < 0.001 |

### ***Inflammatory Markers***

|     |               |                              |                   |                                   |           |                                                               |              |
|-----|---------------|------------------------------|-------------------|-----------------------------------|-----------|---------------------------------------------------------------|--------------|
| TNF | Blood and CSF | Qu et al., 2023 (#171)       | Meta-analysis     | 9,032 PD, 12,628 HC (152 studies) | Increased | Hedges' g = 0.593                                             | p < 0.001    |
| TNF | Blood         | Reale et al., 2009 (#184)    | Original research | 40 PD, 40 HC                      | Increased | 192% elevation in people with PD                              | p < 0.001    |
| TNF | Serum         | Brodacki et al., 2008 (#185) | Original research | 55 PD, 20 HC                      | Increased | 17% elevation in people with PD (change inferred from figure) | p < 0.001    |
| TNF | CSF           | Mogi et al., 1994 (#186)     | Original research | 15 PD, 16 HC                      | Increased | 332% elevation in people with PD                              | p < 0.005    |
| TNF | Blood and CSF | Schröder et al., 2018 (#347) | Original research | 10 PD, 13 HC                      | Increased | Significant elevation in CSF, exact value not reported        | p < 0.05     |
| TNF | Brain tissue  | Boka et al., 1994 (#181)     | Original research | 3 PD, 3 HC                        | Increased | 7-fold elevation in people with PD                            | not reported |

|              |                      |                                |                   |                                   |           |                                                                      |           |
|--------------|----------------------|--------------------------------|-------------------|-----------------------------------|-----------|----------------------------------------------------------------------|-----------|
| TNF          | CSF and Brain tissue | Mogi et al., 1994 (#186)       | Original research | 9 PD, 8 HC                        | Increased | 266% elevation in striatum in people with PD                         | p < 0.05  |
| IL-6         | Blood and CSF        | Qu et al., 2023 (#171)         | Meta-analysis     | 9,032 PD, 12,628 HC (152 studies) | Increased | Hedges' g = 0.603                                                    | P < 0.001 |
| IL-6         | Serum                | Brodacki et al., 2008 (#185)   | Original research | 55 PD, 20 HC                      | Increased | 43% elevation in people with PD (change inferred from figure)        | p < 0.001 |
| IL-6         | Plasma and CSF       | Blum-Degen et al., 1995 (#187) | Original research | 22 PD, 12 HC                      | Increased | 50% elevation in CSF in people with PD (change inferred from figure) | P = 0.013 |
| IL-6         | Serum                | Scalzo et al., 2010 (#193)     | Original research | 44 PD, 22 HC                      | Increased | 57% elevation in people with PD                                      | P = 0.01  |
| IL-6         | Blood                | Diaz et al., 2022 (#194)       | Original research | 22 PD, 14 HC                      | Increased | 83% elevation in people with PD (change inferred from figure)        | p = 0.005 |
| IL-6         | CSF                  | Müller et al., 1998 (#195)     | Original research | 22 PD                             | Increased | 62% elevation in people with PD                                      | p = 0.013 |
| IL-6         | Blood and CSF        | Schröder et al., 2018 (#347)   | Original research | 10 PD, 13 HC                      | Increased | Significant elevation in CSF, exact value not reported               | p < 0.05  |
| CRP          | Blood and CSF        | Qu et al., 2023 (#171)         | Meta-analysis     | 9,032 PD, 12,628 HC (152 studies) | Increased | Hedges' g = 0.510                                                    | p < 0.001 |
| CRP          | Serum and CSF        | Qiu et al., 2019 (#201)        | Meta-analysis     | 2646 PD, 193 HC (23 studies)      | Increased | Serum SMD = 1.115; CSF SMD = 1.127                                   | p < 0.001 |
| IL-1 $\beta$ | Serum and CSF        | Qu et al., 2023 (#171)         | Meta-analysis     | 9,032 PD, 12,628 HC (152 studies) | Increased | Hedges' g = 1.3                                                      | p < 0.001 |
| IL-1 $\beta$ | Blood                | Reale et al., 2009 (#184)      | Original research | 40 PD, 40 HC                      | Increased | 45% elevation in people with PD                                      | p < 0.001 |
| IL-1 $\beta$ | Plasma and CSF       | Blum-Degen et al., 1995 (#187) | Original research | 22 PD, 12 HC                      | Increased | 29% elevation in CSF in people with PD (change inferred from figure) | P = 0.021 |
| CX3CL1       | Serum and CSF        | Qu et al., 2023 (#171)         | Meta-analysis     | 9,032 PD, 12,628 HC (152 studies) | Increased | Hedges' g = 0.361                                                    | p < 0.001 |

|              |               |                              |                   |                                   |           |                                                                |            |
|--------------|---------------|------------------------------|-------------------|-----------------------------------|-----------|----------------------------------------------------------------|------------|
| CX3CL1       | Plasma        | Li et al., 2022 (#348)       | Original research | 76 PD, 76 HC                      | Increased | 86% elevation in people with PD                                | p = 0.006  |
| Clusterin    | Plasma        | Kitamura et al., 2018 (#219) | Original research | 16 PD, 8 HC                       | Decreased | 0.5-0.6- fold reduction in people with PD                      | p < 0.05   |
| CCL2/MCP1    | Serum and CSF | Qu et al., 2023 (#171)       | Meta-analysis     | 9,032 PD, 12,628 HC (152 studies) | Increased | Hedges' g = 0.911                                              | p = 0.007  |
| CCL2/MCP1    | Blood         | Reale et al., 2009 (#184)    | Original research | 40 PD, 40 HC                      | Increased | 228% elevation in PD                                           | p < 0.001  |
| CCL2/MCP1    | Blood and CSF | Schröder et al., 2018 (#347) | Original research | 10 PD, 13 HC                      | Increased | Significant elevation in CSF, exact value not reported         | p < 0.05   |
| CXCL12       | Plasma        | Li et al., 2022 (#348)       | Original research | 76 PD, 76 HC                      | Increased | 36% elevation in people with PD                                | p < 0.001  |
| CXCL12       | Serum         | Bagheri et al., 2018 (#351)  | Original research | 30 PD, 50 HC                      | Increased | 133% elevation in people with PD (change inferred from figure) | p < 0.0001 |
| sTNFR1       | Serum and CSF | Qu et al., 2023 (#171)       | Meta-analysis     | 9,032 PD, 12,628 HC (152 studies) | Increased | Hedges' g = 0.449                                              | p = 0.048  |
| NT-proBNP    | Serum and CSF | Qu et al., 2023 (#171)       | Meta-analysis     | 9,032 PD, 12,628 HC (152 studies) | Increased | Hedges' g = 0.533                                              | p < 0.001  |
| NT-proBNP    | Blood         | Choe et al., 2020 (#353)     | Original research | 285 PD, 570 HC                    | Increased | 67% elevation in people with PD                                | p < 0.001  |
| IFN-α2       | Serum and CSF | Qu et al., 2023 (#171)       | Meta-analysis     | 9,032 PD, 12,628 HC (152 studies) | Decreased | Hedges' g = -0.831                                             | P=0.008    |
| IL-4         | Serum and CSF | Qu et al., 2023 (#171)       | Meta-analysis     | 9,032 PD, 12,628 HC (152 studies) | Decreased | Hedges' g = -0.710                                             | P=0.026    |
| IL-4         | Serum         | Brodacki et al., 2008 (#185) | Original research | 55 PD, 20 HC                      | Increased | 7% elevation in people with PD (change inferred from figure)   | p < 0.001  |
| Nitric Oxide | Serum         | Kouti et al., 2013 (#357)    | Original research | 58 PD, 15 HC                      | Increased | 298% elevation in people with PD                               | p < 0.0001 |
| Nitric Oxide | CSF           | Qu et al., 2023 (#171)       | Meta-analysis     | 9,032 PD, 12,628 HC (152 studies) | Increased | Hedges' g = 0.901                                              | p = 0.013  |

|                               |        |                                   |                   |               |                       |                                                                                                                                                                                      |                        |
|-------------------------------|--------|-----------------------------------|-------------------|---------------|-----------------------|--------------------------------------------------------------------------------------------------------------------------------------------------------------------------------------|------------------------|
| Nitric Oxide                  | CSF    | Santos-Lobato et al., 2022 (#358) | Original research | 47 PD, 20 HC  | Increased             | F(2,47) = 3.25 for metabolite nitrite in CSF in people with PD<br>F(2,47) = 5.89 for metabolite nitrite in CSF in people with PD with dyskinesia                                     | p = 0.04<br>p = 0.005  |
| <b>Neuroendocrine Markers</b> |        |                                   |                   |               |                       |                                                                                                                                                                                      |                        |
| Cortisol                      | Serum  | Breen et al., 2014 (#232)         | Original research | 30 PD, 15 HC  | Increased             | Increased 24hr-cortisol parameters in people with PD: acrophase ( $\beta = 0.502$ ), amplitude ( $\beta = 0.485$ ), and area under the curve ( $\beta = 0.615$ )<br>F(1,30) = 15.720 | p < 0.002<br>p < 0.001 |
| Cortisol                      | Plasma | Hartmann et al., 1997 (#233)      | Original research | 12 PD, 10 HC  | Increased             | 52% elevation in 24hr-pulsatile cortisol production rate in people with PD                                                                                                           | p < 0.05               |
|                               |        |                                   |                   |               |                       | 79% elevation in mass of cortisol secreted per burst in people with PD                                                                                                               | p < 0.05               |
| Cortisol                      | Saliva | Costa et al., 2019 (#234)         | Original research | 18 PD, 18 HC  | Increased             | 56% elevation in 24-hr cortisol levels in people with PD                                                                                                                             | p = 0.03               |
| Cortisol                      | Saliva | Skogar et al., 2011 (#235)        | Original research | 59 PD, 608 HC | Increased             | 28% elevation in daytime cortisol secretion in people with PD                                                                                                                        | p < 0.001              |
| Cortisol                      | Saliva | Djamshidian et al., 2011 (#236)   | Original research | 13 PD, 14 HC  | Increased             | F(2,37) = 4.6                                                                                                                                                                        | p = 0.016              |
| Klotho                        | CSF    | Sancesario et al., 2021 (#243)    | Original research | 26 PD, 9 HC   | Increased in Early PD | F(1,33) = 4.3                                                                                                                                                                        | p < 0.05               |
|                               | Serum  |                                   | Original research | 22 PD, 9 HC   | Decreased in Early PD | F(1,29) = 4.6                                                                                                                                                                        | p < 0.05               |
| Klotho                        | CSF    | Zimmermann et al., 2021 (#241)    | Original research | 125 PD, 50 HC | Decreased             | 15% reduction in people with PD                                                                                                                                                      | p < 0.001              |
| Klotho                        | Plasma | Kakar et al., 2021 (#242)         | Original research | 61 PD, 61 HC  | Unchanged             | None                                                                                                                                                                                 | n/a                    |
| Insulin                       | Plasma | Sanchez-Gomez et al., 2020 (#237) | Original research | 73 PD, 38 HC  | Decreased             | 20% reduction in fasting insulin in people with PD                                                                                                                                   | p = 0.04               |

|           |        |                               |                   |               |                              |                                                                                                                |           |
|-----------|--------|-------------------------------|-------------------|---------------|------------------------------|----------------------------------------------------------------------------------------------------------------|-----------|
| Insulin   | Plasma | Hogg et al., 2018 (#266)      | Original research | 154 PD        | Increased insulin resistance | 58.4% of people with PD had undiagnosed, abnormal insulin resistance                                           | n/a       |
| Vitamin D | Serum  | Evatt et al., 2011 (#238)     | Original research | 170 PD        | Decreased                    | 69.4% of people with PD had Vitamin D insufficiency or deficiency                                              | n/a       |
| Vitamin D | Plasma | Evatt et al., 2008 (#239)     | Original research | 100 PD, 99 HC | Decreased                    | 14% reduction in 25(OH)D levels in people with PD; 53% prevalence of vitamin D insufficiency in people with PD | p < 0.01  |
| Melatonin | Plasma | Videnovic et al., 2014 (#240) | Original research | 20 PD, 15 HC  | Decreased                    | 4-fold decrease in amplitude of the circadian rhythm of melatonin and the 24-hour AUC                          | p < 0.001 |

#### **Markers of PD Pathology**

|                     |       |                                 |                   |                                      |              |                                         |            |
|---------------------|-------|---------------------------------|-------------------|--------------------------------------|--------------|-----------------------------------------|------------|
| $\alpha$ -synuclein | CSF   | Grossauer et al., 2023 (#320)   | Meta-analysis     | 1855 synucleinopathies, 1378 control | Positive SAA | 0.88 sensitivity, 0.95 specificity      | n/a        |
| $\alpha$ -synuclein | CSF   | Yoo et al., 2022 (#321)         | Meta-analysis     | 2722 synucleinopathies, 2278 control | Positive SAA | 0.88 sensitivity, 0.95 specificity      | n/a        |
| $\alpha$ -synuclein | CSF   | Kang et al., 2019 (#312)        | Original research | 105 PD, 79 HC                        | Decreased    | 10% reduction in people with PD         | p = 0.009  |
| $\alpha$ -synuclein | CSF   | Orru et al., 2020 (#314)        | Original research | 108 PD, 85 HC                        | Positive SAA | 97% sensitivity, 87% specificity        | n/a        |
| $\alpha$ -synuclein | CSF   | Majbour et al., 2021 (#317)     | Original research | 94 PD, 52 HC                         | Decreased    | 8% reduction in people with PD          | p < 0.05   |
| $\alpha$ -synuclein | CSF   | Russo et al., 2021 (#318)       | Original research | 30 PD, 30 HC                         | Positive SAA | 86-96% sensitivity, 93-100% specificity | n/a        |
| $\alpha$ -synuclein | CSF   | Poggiolini et al., 2022 (#319)  | Original research | 74 PD, 55 HC                         | Positive SAA | 89% sensitivity, 96% specificity        | n/a        |
| $\alpha$ -synuclein | CSF   | Kang et al., 2016 (#360)        | Original research | 412 PD, 189 HC                       | Decreased    | 13% reduction in people with PD         | p = 0.0002 |
| NFL                 | Serum | Mollenhauer et al., 2020 (#335) | Original research | 397 PD, 187 HC                       | Increased    | 8% elevation in people with PD          | p = 0.03   |

|     |     |                                    |                      |              |           |                                    |            |
|-----|-----|------------------------------------|----------------------|--------------|-----------|------------------------------------|------------|
| NFL | CSF | Mollenhauer et al., 2020<br>(#335) | Original<br>research | 98 PD, 61 HC | Increased | 20% elevation in people with<br>PD | p = 0.0001 |
|-----|-----|------------------------------------|----------------------|--------------|-----------|------------------------------------|------------|

PD, Parkinson's disease; HC, healthy control; CSF, cerebrospinal fluid; SNc, substantia nigra pars compacta; BDNF, brain-derived neurotrophic factor; GDNF, glial cell line-derived neurotrophic factor; IGF-1, insulin-like growth factor 1 (IGF-1); VEGF, vascular endothelial growth factor; NGF, nerve growth factor ; CDNF, cerebral dopamine neurotrophic factor; MANF, mesencephalic astrocyte-derived neurotrophic factor; GPLD1, glycosylphosphatidylinositol-specific phospholipase D1; TNF, tumor necrosis factor; CRP, C-reactive protein; sTNFR1, soluble TNF receptor-1; NT-proBNP, N-terminal pro-B-type natriuretic peptide; SMD, standardized mean difference; MD, mean difference; AUC, area under the curve; SAA, seed amplification assay

Supplemental Table 1B. Biomarkers Changes in Response to Aerobic Exercise

| Biomarker                                   | Sample Source | Study (reference number)   | Type of Study     | Study Population                               | Sample size (type of study)                          | Direction of Change with AE | Magnitude of Change | Associated P-value |
|---------------------------------------------|---------------|----------------------------|-------------------|------------------------------------------------|------------------------------------------------------|-----------------------------|---------------------|--------------------|
| <i>Neurotrophic/Neuroprotective Markers</i> |               |                            |                   |                                                |                                                      |                             |                     |                    |
| BDNF                                        | Blood         | Szuhany et al. 2015 (#78)  | Meta-analysis     | Healthy adults and adults with chronic disease | 703 (13 RCTs and single group intervention studies)  | Increased                   | Hedges' g = 0.27    | p = 0.005          |
| BDNF                                        | Blood         | Gholami et al., 2025 (#79) | Meta-analysis     | Healthy adults and adults with chronic disease | 658 (14 RCTs)                                        | Increased                   | SMD = 0.48          | p = 0.037          |
| BDNF                                        | Serum         | Rotondo et al. 2023 (#80)  | Meta-analysis     | Healthy adults and people with PD              | 180 (5 RCTs and single group intervention studies)   | Increased                   | MD = 5.99 ng/mL     | p = 0.04           |
| BDNF                                        | Blood         | Paterno et al. 2024 (#81)  | Meta-analysis     | People with PD                                 | 185 (16 RCTS and NCTs)                               | Increased                   | SMD = 0.70          | p = 0.04           |
| BDNF                                        | Serum         | Kaagman et al. 2024 (#82)  | Meta-analysis     | People with PD                                 | 224 (5 RCTs)                                         | Increased                   | SMD = 1.20          | p = 0.0004         |
| GDNF                                        | Serum         | Kong et al. 2024 (#97)     | Original research | Healthy adults                                 | 160 (single RCT)                                     | Increased                   | 2% elevation        | p = 0.027          |
| IGF-1                                       | Plasma        | Baker et al. 2010 (#108)   | Original research | Older men with MCI                             | 15 (single RCT)                                      | Increased                   | Not reported        | p = 0.02           |
| IGF-1                                       | Plasma        | Nasir et al., 2024 (#109)  | Meta-analysis     | Postmenopausal women                           | 1170 (16 RCTs)                                       | Increased                   | Effect size 3.132   | p < 0.001          |
| VEGF                                        | Blood         | Song et al. 2024 (#126)    | Meta-analysis     | Healthy adults                                 | 1097 (40 RCTs and single group intervention studies) | Increased                   | SMD = 0.18          | p = 0.02           |



|         |                 |                                 |                   |                                                |                                                      |                                                            |                                                                   |             |
|---------|-----------------|---------------------------------|-------------------|------------------------------------------------|------------------------------------------------------|------------------------------------------------------------|-------------------------------------------------------------------|-------------|
| Irisin  | Blood           | Jandova et al. 2021 (#138)      | Meta-analysis     | Healthy adults and adults with chronic disease | 1184 (59 RCTs and single group intervention studies) | Increased                                                  | SMD = 0.39                                                        | p < 0.00001 |
| Irisin  | Serum           | Zhang et al. 2023 (#134)        | Original research | People with PD                                 | 23 (single group intervention study)                 | Increased                                                  | 12% elevation                                                     | p = 0.041   |
| GPLD1   | Plasma          | Horowitz et al. 2020 (#142)     | Original research | Healthy young adults                           | 20 (observational study)                             | Increased in physically active adults                      | 25% increased levels in active adults (inferred from figure)      | p < 0.05    |
| SIRT3   | Skeletal muscle | Johnson et al. 2015 (#156)      | Original research | Healthy older adults                           | 23 (RCT)                                             | Increased                                                  | 6-fold elevation                                                  | p = 0.012   |
| SIRT3   | Skeletal muscle | Johnson et al. 2015 (#156)      | Original research | Overweight adolescents                         | 20 (RCT)                                             | Increased                                                  | 4-fold elevation                                                  | p = 0.037   |
| SIRT3   | Skeletal muscle | Vargas-Ortiz et al. 2015 (#157) | Original research | Overweight adolescents                         | 14 (single group intervention study)                 | Increased                                                  | 19% elevation                                                     | p = 0.014   |
| Lactate | Blood           | Cerexhe et al. 2022 (#167)      | Original research | Adults with MS                                 | 59 (RCTs and single group intervention studies)      | Decreased with submaximal AE and increased with maximal AE | SMD = -0.822 for lactate (sub-max); SMD = -0.54 for lactate (max) | p < 0.001   |
| Lactate | Blood           | Zhao et al. 2021 (#168)         | Meta-analysis     | Adults with Type II DM                         | 43 (RCTs and single group intervention studies)      | Decreased                                                  | SMD = -0.73                                                       | p = 0.001   |
| Lactate | Blood           | Di Martino et al. 2018 (#166)   | Original research | People with PD                                 | 10 (single group intervention study)                 | Decreased                                                  | -34% lactate levels                                               | p < 0.05    |
| NGF     | Blood           | Lippi et al. 2020 (#346)        | Systematic-review | Healthy adults and adults with chronic disease | 292 (RCTs and single group intervention studies)     | Inconclusive                                               | n/a                                                               | n/a         |

| <i>Inflammatory Markers</i> |       |                                     |                   |                              |                                      |                                                 |                    |            |
|-----------------------------|-------|-------------------------------------|-------------------|------------------------------|--------------------------------------|-------------------------------------------------|--------------------|------------|
| TNF                         | Blood | Khalafi et al., 2023 (#176)         | Meta-analysis     | Older adults                 | 1898 (20 RCTs)                       | Decreased                                       | SMD = -0.44        | p = 0.009  |
| TNF                         | Blood | Zheng et al., 2019 (#192)           | Meta-analysis     | Middle aged and older adults | 1250 (11 RCTs and NCTs)              | Decreased                                       | SMD = 0.75         | p = 0.0007 |
| TNF                         | Blood | Papagianni et al., 2023 (#173)      | Meta-analysis     | Adults with Type II DM       | 1239 (26 RCTs)                       | Decreased                                       | SMD = -2.70        | p < 0.001  |
| TNF                         | Blood | Hejazi et al., 2023 (#174)          | Meta-analysis     | Adults with Type II DM       | 1257 (25 RCTs)                       | Decreased                                       | SMD = -1.20        | p = 0.001  |
| TNF                         | Blood | Del Rosso et al., 2023 (#209)       | Meta-analysis     | Overweight/obese adults      | 2422 (49 RCTs)                       | Decreased                                       | Hedges' g = -0.491 | p < 0.001  |
| TNF                         | Blood | Zolandz et al., 2014 (#177)         | Original research | People with PD               | 12 (single group intervention study) | Decreased                                       | 7% reduction       | p = 0.03   |
| TNF                         | Serum | Malczynska-Sims et al., 2022 (#178) | Original research | People with PD               | 28 (single NCT)                      | Decreased                                       | 22% reduction      | p = 0.034  |
| IL-6                        | Blood | Papagianni et al., 2023 (#173)      | Meta-analysis     | Adults with Type II DM       | 1239 (26 RCTs)                       | Decreased                                       | WMD = -1.05        | p < 0.001  |
| IL-6                        | Blood | Hejazi et al., 2022 (#174)          | Meta-analysis     | Adults with Type II DM       | 1257 (25 RCTs)                       | Decreased                                       | SMD = -1.08        | p = 0.0001 |
| IL-6                        | Blood | Zheng et al., 2019 (#192)           | Meta-analysis     | Middle aged and older adults | 1250 (11 RCTs and NCTs)              | Decreased                                       | SMD = 0.75         | p = 0.0007 |
| IL-6                        | Blood | Del Rosso et al., 2023 (#209)       | Meta-analysis     | Overweight/obesity           | 3766 (25 RCTs)                       | Decreased                                       | Hedges' g = -0.276 | p=0.001    |
| CRP                         | Blood | Khalafi et al., 2023 (#176)         | Meta-analysis     | Older adults                 | 1898 (20 RCTs)                       | Decreased                                       | SMD = -0.46        | p = 0.04   |
| CRP                         | Blood | Zheng et al., 2019 (#192)           | Meta-analysis     | Middle aged and older adults | 1250 (11 RCTs and NCTs)              | Decreased                                       | SMD = 0.53         | p = 0.0002 |
| CRP                         | Blood | Papagianni et al., 2023 (#173)      | Meta-analysis     | Adults with Type II DM       | 1239 (26 RCTs)                       | Decreased                                       | WMD = -0.91        | p < 0.001  |
| CRP                         | Blood | Hejazi et al., 2023 (#174)          | Meta-analysis     | Adults with Type II DM       | 1257 (25 RCTs)                       | Decreased                                       | SMD = -0.67        | p = 0.0006 |
| CRP                         | Blood | Del Rosso et al., 2023 (#209)       | Meta-analysis     | Overweight/obesity           | 6476 (25 RCTs)                       | Decreased in obese adults                       | Hedges' g = -0.236 | p < 0.001  |
| IL-1 $\beta$                | Blood | Behboudi & Eizadi, 2017 (#210)      | Meta-analysis     | Overweight/obesity           | 6476 (25 RCTs)                       | Decreased with mixed AE and resistance exercise | Hedges' g = -0.968 | p = 0.011  |

|                       |        |                               |                                     |                                                     |                                      |                                                                                               |                              |              |
|-----------------------|--------|-------------------------------|-------------------------------------|-----------------------------------------------------|--------------------------------------|-----------------------------------------------------------------------------------------------|------------------------------|--------------|
| IL-1 $\beta$          | Serum  | Del Rosso et al., 2023 (#209) | Original research                   | Sedentary obese women                               | 30 (single RCT)                      | Decreased                                                                                     | 23% reduction                | p = 0.001    |
| CX3CXL1 (Fractalkine) | Blood  | Kumar et al., 2022 (#213)     | Original research                   | Young & middle aged adults with mobility disability | 38 (single group intervention study) | Decreased with mixed AE and resistance exercise                                               | Not reported                 | p = 0.000054 |
| CX3CXL1 (Fractalkine) | Blood  | Njerve et al., 2016 (#214)    | Original research                   | T2DM and stable coronary artery disease             | 114 (substudy of RCT)                | Increased with mixed AE and resistance exercise only in people with advanced vascular disease | Not reported                 | p = 0.078    |
| Clusterin             | Plasma | De Miguel et al., 2021 (#216) | Original research                   | Veterans with MCI                                   | 20 (single group intervention study) | Increased                                                                                     | 4% elevation                 | p<0.05       |
| CCL2/MCP1             | Blood  | Trøseid et al., 2004 (#349)   | Original research                   | Men with metabolic syndrome                         | 22 (single RCT)                      | Decreased                                                                                     | Median difference = 48 pg/ml | p = 0.04     |
| CCL2/MCP1             | Blood  | Clifford et al., 2023 (#350)  | Original research                   | Cancer survivors                                    | 20 (single RCT)                      | Decreased with low intensity AE                                                               | MD = 13.2 pg/mL              | p = 0.04     |
| CXCL12                | Blood  | Clifford et al., 2023 (#350)  | Original research                   | Cancer survivors                                    | 20 (single RCT)                      | Decreased with high intensity AE                                                              | MD = 150.3 pg/mL             | p = 0.02     |
| sTNFR1                | Blood  | Tsukui et al., 2000 (#352)    | Original research                   | Healthy women                                       | 41 (single RCT)                      | Decreased                                                                                     | MD = 300 pg/mL               | p < 0.01     |
| NT-Pro-BNP            | Blood  | Bordbar et al., 2012 (#354)   | Original research                   | Healthy adults                                      | 12 (single RCT)                      | Decreased                                                                                     | MD = 14.7 pg/mL              | p = 0.013    |
| NT-Pro-BNP            | Serum  | Malandish et al., 2022 (#355) | Systematic review and meta-analysis | Adults with heart failure                           | 2563 (28 NCTs and RCTs)              | Decreased                                                                                     | SMD = -0.336                 | p = 0.004    |
| IL-4                  | Blood  | Zheng et al., 2019 (#192)     | Meta-analysis                       | Middle aged and older adults                        | 1250 (11 RCTs and NCTs)              | Unchanged                                                                                     | SMD = 0.00                   | p = 0.76     |

|                               |                      |                                   |                   |                                                             |                                                     |                               |                                                                                    |                                            |
|-------------------------------|----------------------|-----------------------------------|-------------------|-------------------------------------------------------------|-----------------------------------------------------|-------------------------------|------------------------------------------------------------------------------------|--------------------------------------------|
| IL-4                          | Blood                | Conroy et al., 2016 (#356)        | Original research | Postmenopausal healthy women                                | 720 (across 2 RCTs)                                 | Unchanged                     | Study 1:<br>4.28% reduction<br>Study 2:<br>8.24% reduction                         | Study 1:<br>p= 0.54<br>Study 2:<br>p= 0.32 |
| Nitric Oxide                  | Serum                | Arefirad et al., 2022 (#359)      | Meta-analysis     | Healthy adults and adults with chronic disease              | 136 (11 RCTs and NCTs)                              | Increased                     | Hedges' g = 1.82                                                                   | p = 0.00                                   |
| <b>Neuroendocrine Markers</b> |                      |                                   |                   |                                                             |                                                     |                               |                                                                                    |                                            |
| Cortisol                      | Serum, saliva, urine | Beserra et al., 2018 (#244)       | Meta-analysis     | Major depressive disorder                                   | 209 (5 RCTs)                                        | Decreased                     | SMD = -0.76                                                                        | p < 0.001                                  |
| Cortisol                      | Plasma               | Baker et al., 2010 (#108)         | Original research | Adults with MCI                                             | 33 (single RCT)                                     | Decreased in women            | F <sub>1,25</sub> = 6.00 (moderate effect on reduction of post-awakening cortisol) | p = 0.02                                   |
| Cortisol                      | Saliva               | Symth et al., 2019 (#261)         | Original research | People with PD-MCI                                          | 8 (single group intervention study)                 | Decreased                     | 19% reduction in post-awakening cortisol                                           | p = 0.02                                   |
| Klotho                        | Plasma, serum        | Correa et al., 2022 (#252)        | Meta-analysis     | Healthy adults and adults with chronic diseases             | 92 (5 RCTs)                                         | Increased                     | Hedges' g = 0.92                                                                   | p < 0.0001                                 |
| Insulin                       | Plasma               | Sampath Kumar et al., 2019 (#248) | Meta-analysis     | Adults with Type II DM                                      | 175 (4 RCTs)                                        | Decreased insulin resistance  | Chi2 = 26.50                                                                       | p < 0.00001                                |
| Insulin                       | Plasma               | Mann et al., 2014 (#275)          | Meta-analysis     | Adults with Type II DM or metabolic syndromes/abnormalities | 845 (16 RCTs and single group intervention studies) | Increased insulin sensitivity | Effect size = 1.07                                                                 | not reported                               |

|                                |       |                                 |                   |                                                                                       |                                                     |                                               |                                      |              |
|--------------------------------|-------|---------------------------------|-------------------|---------------------------------------------------------------------------------------|-----------------------------------------------------|-----------------------------------------------|--------------------------------------|--------------|
| Vitamin D [25(OH)D]            | Serum | Zhang & Cao, 2022 (#249)        | Systematic review | Healthy adults, adults with conditions such as osteoporosis, COPD, overweight/obesity | 910 (12 RCTs and single group intervention studies) | Increased in people with vitamin D deficiency | Significant increase in most studies | not reported |
| Melatonin                      | Serum | Al-Rawaf et al., 2023 (#246)    | Original research | Healthy adults                                                                        | 80 (single group intervention study)                | Increased                                     | 3-fold increase                      | p = 0.001    |
| <b>Markers of PD Pathology</b> |       |                                 |                   |                                                                                       |                                                     |                                               |                                      |              |
| NFL                            | Serum | Ercan et al., 2021 (#339)       | Original research | Relapsing remitting multiple sclerosis                                                | 38 (single RCT)                                     | Decreased                                     | 32% reduction                        | p = 0.02     |
| NFL                            | Serum | Frederiksen et al., 2023 (#340) | Original research | Alzheimer's disease                                                                   | 136 (single RCT)                                    | Unchanged                                     | n/a                                  | n/a          |

PD, Parkinson's disease; AE, aerobic exercise; MCI, mild cognitive impairment, DM, diabetes mellitus; BDNF, brain-derived neurotrophic factor; GDNF, glial cell line-derived neurotrophic factor; IGF-1, insulin-like growth factor 1 (IGF-1); VEGF, vascular endothelial growth factor; NGF, nerve growth factor ; CDNF, cerebral dopamine neurotrophic factor; MANF, mesencephalic astrocyte-derived neurotrophic factor; GPLD1, glycosylphosphatidylinositol-specific phospholipase D1; TNF, tumor necrosis factor; CRP, C-reactive protein; sTNFR1, soluble TNF receptor-1; NT-proBNP, N-terminal pro-B-type natriuretic peptide; SMD, standardized mean difference; MD, mean difference; RCT, randomized controlled trial; NCT, non-randomized controlled trial
